# Supplementary material
Source: publisher site journal article supplement (https://www.dovepress.com/article/316555)
Supplement: Supplementary file 1 [file get_supplementary_file.php]

**Supplementary Material A**

**Pulmonary rehabilitation questionnaire for health care providers**

**We are trying to develop a pulmonary rehabilitation programme in your area and would be grateful if you could complete this questionnaire to help us understand your opinions of the process and practice of pulmonary rehabilitation.**

**1. Which best describes your professional job category?**

| ❑ | Nurse | ❑ | Primary care doctor |
| --- | --- | --- | --- |
| ❑ | Community health worker | ❑ | Specialist respiratory nurse |
| ❑ | Family physician | ❑ | Physiotherapist |
| ❑ | Hospital doctor | ❑ | Other:  _______________________________________________ |

**2. What responsibilities do you have for the care of people with COPD? Tick all that apply.**

| ❑ | Diagnosis | ❑ | Prescribing | ❑ | Inpatient treatment |
| --- | --- | --- | --- | --- | --- |
| ❑ | Non-urgent care | ❑ | Ongoing management | ❑ | Outpatient clinics |
| ❑ | Urgent assessments | ❑ | Admission prevention | ❑ | Primary care |
| ❑ | Oxygen therapy | ❑ | Medication checks | ❑ | Other |

If other, please give details

|  |
| --- |

**How many years’ experience do you have of caring for people with respiratory problems?**

Please enter a whole number.

**2. Is pulmonary rehabilitation available in your area? Yes/ No**

**If yes please give brief details _____________________________________________________________**

| **THE PULMONARY REHABILITATION (PR) REFERRAL PROCESS** |
| --- |

**I feel sure that I understand the eligibility criteria for pulmonary rehabilitation.**

|  | 0 | 1 | 2 | 3 | 4 | 5 | 6 | 7 | 8 | 9 | 10 |  |
| --- | --- | --- | --- | --- | --- | --- | --- | --- | --- | --- | --- | --- |
| Not at all | ❑ | ❑ | ❑ | ❑ | ❑ | ❑ | ❑ | ❑ | ❑ | ❑ | ❑ | Completely |

**I feel adequately prepared to refer patients to pulmonary rehabilitation.**

|  | 0 | 1 | 2 | 3 | 4 | 5 | 6 | 7 | 8 | 9 | 10 |  |
| --- | --- | --- | --- | --- | --- | --- | --- | --- | --- | --- | --- | --- |
| Not at all | ❑ | ❑ | ❑ | ❑ | ❑ | ❑ | ❑ | ❑ | ❑ | ❑ | ❑ | Completely |

**3. Do you believe that PR is worthwhile in respiratory disease?**

| ❑ | Yes, very much |
| --- | --- |
| ❑ | Yes, a little |
| ❑ | No |
| ❑ | Not sure |

**If pulmonary rehabilitation is or was planned to be available in your area**

**What resources (eg. tools, systems or processes) are available in your practice to support clinicians in making pulmonary rehabilitation referrals? Tick all that apply.**

| ❑ | Prompts in clinical system | ❑ | Information about PR for clinicians | ❑ | Clear referral criteria |
| --- | --- | --- | --- | --- | --- |
| ❑ | Electronic referral | ❑ | Skills training for communicating effectively with patients | ❑ | Other |

If other, please give details

|  |
| --- |

**4. What factors might influence your decision to refer a patient to pulmonary rehabilitation?**

|  | No influence | Some influence | Strong influence |
| --- | --- | --- | --- |
| Increasing shortness of breath | ❑ | ❑ | ❑ |
| MRC Dyspnoea Scale ≥3 | ❑ | ❑ | ❑ |
| Mobility is affected by breathlessness | ❑ | ❑ | ❑ |
| Decreasing activity levels | ❑ | ❑ | ❑ |
| Frequent exacerbations | ❑ | ❑ | ❑ |
| Recent hospital discharge after exacerbation | ❑ | ❑ | ❑ |
| Patient is deconditioned | ❑ | ❑ | ❑ |
| Low exercise tolerance | ❑ | ❑ | ❑ |
| Patient anxiety | ❑ | ❑ | ❑ |
| Poor self-management | ❑ | ❑ | ❑ |
| Easy to use referral process | ❑ | ❑ | ❑ |
| Other | ❑ | ❑ | ❑ |

If other, please give details

|  |
| --- |

**In your experience what are the main reasons that you would refer a patient to PR?**

|  |
| --- |

**What factors might influence your decision not to refer an eligible patient to pulmonary rehabilitation?**

|  | No influence | Some influence | Strong influence |
| --- | --- | --- | --- |
| I don’t have enough information about PR | ❑ | ❑ | ❑ |
| I’m uncertain that PR is worthwhile | ❑ | ❑ | ❑ |
| Patient has doubts that PR is worthwhile | ❑ | ❑ | ❑ |
| Patient refuses referral | ❑ | ❑ | ❑ |
| Patient co-morbidities | ❑ | ❑ | ❑ |
| Poor mobility | ❑ | ❑ | ❑ |
| Patient does not fit acceptance criteria for a programme | ❑ | ❑ | ❑ |
| Patient has attended PR previously | ❑ | ❑ | ❑ |
| Transportation problems | ❑ | ❑ | ❑ |
| Distance of class from patients home | ❑ | ❑ | ❑ |
| Lack of time to make referral | ❑ | ❑ | ❑ |
| Timing of classes not convenient for patient | ❑ | ❑ | ❑ |
| I’m unaware of how to refer | ❑ | ❑ | ❑ |
| Difficult referral process | ❑ | ❑ | ❑ |
| Other | ❑ | ❑ | ❑ |

If other, please give details

|  |
| --- |

**For each statement please select the answer that best suits your experience**

|  | Strongly  disagree | Disagree | Not  sure | Agree | Strongly  agree |
| --- | --- | --- | --- | --- | --- |
| I can see the potential value of referring patients to PR | ❑ | ❑ | ❑ | ❑ | ❑ |
| I believe that referring patients to PR is a legitimate part of my role | ❑ | ❑ | ❑ | ❑ | ❑ |
| I’m open to working with colleagues in new ways to enable PR referral to happen | ❑ | ❑ | ❑ | ❑ | ❑ |
| I could easily integrate PR referral into my work | ❑ | ❑ | ❑ | ❑ | ❑ |
| I have confidence in the ability of colleagues who care for people with respiratory problems to refer patients to PR | ❑ | ❑ | ❑ | ❑ | ❑ |

| Training should be provided in my practice so that staff know who to refer to PR | ❑ | ❑ | ❑ | ❑ | ❑ |
| --- | --- | --- | --- | --- | --- |
| Sufficient resources would be available to support PR referral in my practice | ❑ | ❑ | ❑ | ❑ | ❑ |
| I would like to receive reports in my practice about the outcomes for patients following a PR referral | ❑ | ❑ | ❑ | ❑ | ❑ |
| The staff in my practice/ colleagues agree that referring patients to PR is worthwhile | ❑ | ❑ | ❑ | ❑ | ❑ |
| I am confident I could overcome any difficulties I have with regard to referring patients to PR | ❑ | ❑ | ❑ | ❑ | ❑ |

| **IMPROVING REFERRAL AND UPTAKE OF PULMONARY REHABILITATION (PR)** |
| --- |

**What would make it easy for you to refer patients to PR?**

|  |
| --- |

**What could be done to encourage patients to take up PR?**

|  |
| --- |

**Which communication methods are effective for you when communicating with PR providers?**

**Select all that apply.**

| ❑ | Email | ❑ | Letter | ❑ | Telephone | ❑ | Other |
| --- | --- | --- | --- | --- | --- | --- | --- |

If other, please give details

|  |
| --- |

Adapted with kind permission from Dr J Fuld, Addenbrookes Hospital, Cambridge, U.K

**Supplementary material B**

**Pulmonary rehabilitation questionnaire**

**Pulmonary rehabilitation is an important treatment for people like you with lung disease. Pulmonary Rehabilitation helps reduce your breathlessness and allows you to do more. A programme consists of a package of exercise and a programme to help you best manage your disease.**

**We would like to understand how we might best deliver the service to people like you.**

We would be grateful if you could take a minute to complete this brief questionnaire.

**Please circle:**

1. Male / Female
2. Age Group: - Under 40 / 40-50 / 50-60 / 60-70 / 70-80 / over 80
3. How old were you when you left school (college/university) _________
4. Do you currently have a paid job?

Yes/No

Occupation: __________________________

1. Does your breathing problem bother you?

Yes/no

1. Does your breathing problem affect your ability to carry out paid work?

Yes/no

1. Does your breathing problem affect your ability to carry out unpaid work, such as work around the house?

Yes/no

1. Have you ever had to miss a day of paid/unpaid work because of your breathing problem?

Yes/No

1. Are you able to keep up with people of a similar age to you when out walking?

Yes/ No/ I don't go out walking

1. Does your breathing problem keep you from being as active as you would like?

Yes / No

1. Does your breathing problem keep you from visiting with friends and family as often as you would like?

Yes / No

**PLEASE TURN OVER**

**12a.** Would you be interested in participating in a treatment that can make you less breathless and more active? Yes/No

- If Yes…Please go to Question **12b and 12c.**

- If No… Please tick an option below.

Reason for not wanting to participate.

⁯ ❑ Satisfied with current breathing and activity levels.

⁯ ❑ No time to spend on treatment.

⁯ ❑ Concerned about the monetary cost of treatment.

⁯ ❑ Currently using alternative treatment.

⁯ ❑ Other (please provide a reason): ……………………………………….

**12b.** If yes, how and where would you prefer to do this programme?

The package of pulmonary rehabilitation consists of a personalised exercise for you and a programme of education to help you best manage your disease.

| **Please tick all that apply** | | **TICK** |
| --- | --- | --- |
| 1 | In a group supervised by a nurse / physiotherapist at the Hospital. Where I can follow an exercise programme with the support of health care professionals /community health workers |  |
| 2 | In a group supervised by a nurse/physiotherapist at your local hospital /community centre. Where I can follow an exercise programme with the support of health care professionals/ community health workers |  |
| 2 | I would consider working through an exercise and education manual at home with support from a health professional/ community health workers, checking on me and being there to answer questions. |  |
| 3 | I would consider using a web based programme with support from a health care professional/ community health workers checking on me and being there to answer questions. |  |

**12c.** How much time would you be willing to spend participating in a treatment?

❑ Less than 30 minutes per day

❑ 30 minutes to 1 hour per day

❑ 1 to 2 hours per day

❑ More than 2 hours per day

1. Do you use any of the following?

The Internet /web Yes / No

A computer Yes / No

A smart phone Yes / No

A tablet Yes / No

**Thank you for taking the time to complete this questionnaire.**
